# Supplementary material for: Associations between the exposure to organophosphate flame retardants during early pregnancy and the risk of spontaneous abortion based on metabolomics combined with tandem mass spectrometry
Source: PubMed Central journal article supplement — Ann Transl Med. 2021 Aug;9(16):1305. doi: 10.21037/atm-21-3109 (PMC8422145; doi:10.21037/atm-21-3109), 2021-08
Supplement: atm-09-16-1305-dss.pdf [file atm-09-16-1305-dss.pdf]

## Data Sharing Statement

|                     |                                                                                                                                                     |                                                                                                                                                                                            |
|---------------------|-----------------------------------------------------------------------------------------------------------------------------------------------------|--------------------------------------------------------------------------------------------------------------------------------------------------------------------------------------------|
| <b>Article Info</b> | <a href="https://dx.doi.org/10.21037/atm-21-3109">https://dx.doi.org/10.21037/atm-21-3109</a>                                                       |                                                                                                                                                                                            |
| <b>Item</b>         | <b>Question</b>                                                                                                                                     | <b>Authors' Response<br/>(place "-" if not applicable)</b>                                                                                                                                 |
| 1                   | Would you like to share data collected for your study to others?                                                                                    | Yes.                                                                                                                                                                                       |
| 2                   | If not, would you like to share the reason for your decision?                                                                                       | -                                                                                                                                                                                          |
| 3                   | What data in particular will be shared?                                                                                                             | The metabolomic data in particular will be shared, and we also found a correlation between potential biomarkers of abortion and OPRFs, which has seldom been provided in previous studies. |
| 4                   | Any other documents will be shared? Such as study protocol, statistical analysis plan, informed consent form, clinical study report, analytic code. | Study protocol, statistical analysis plan, methods of data acquisition and analysis will also be shared if requested.                                                                      |
| 5                   | When will data availability begin?                                                                                                                  | From the publication date.                                                                                                                                                                 |
| 6                   | When will data availability end?                                                                                                                    | Two years within the publication date, since the technique or survival date may be updated over time.                                                                                      |
| 7                   | To whom will you share the data?                                                                                                                    | Pharmaceutical research or obstetrics and Gynecology experts who are interested in studies of spontaneous abortion.                                                                        |
| 8                   | For what type of analysis or purpose?                                                                                                               | For analysis to evaluate the adverse impact of organophosphorus flame retardant on pregnancy.                                                                                              |
| 9                   | How or where can the data/documents be obtained?                                                                                                    | Emails could be sent to the address below to obtain the shared data: <a href="mailto:zhxks2005@163.com">zhxks2005@163.com</a> .                                                            |
| 10                  | Any other restrictions?                                                                                                                             | We may balance the potential benefits and risks for each request and then provide the data that could be shared.                                                                           |
